# Supplementary material
Source: Springer Nature journal article supplement (https://www.springermedizin.de/resource/supplementary/12958_2014_1268_MOESM1_ESM.pdf/9567188)

**E2****a**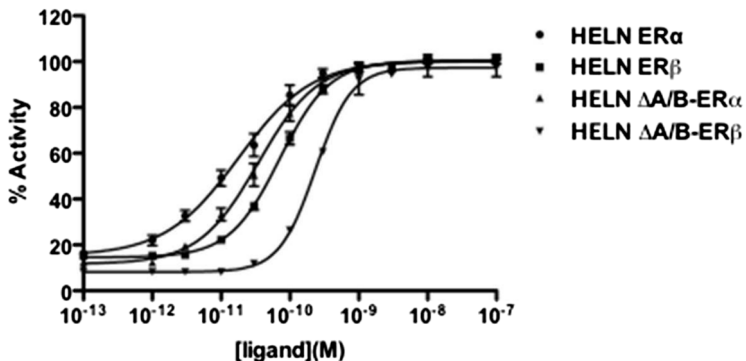**genistein****b**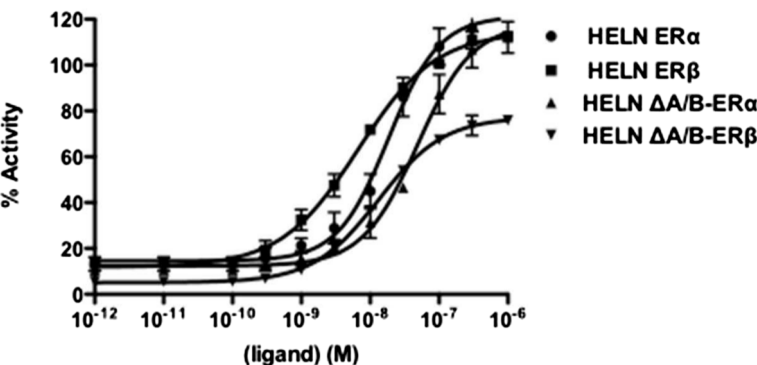**Ferutinine****c**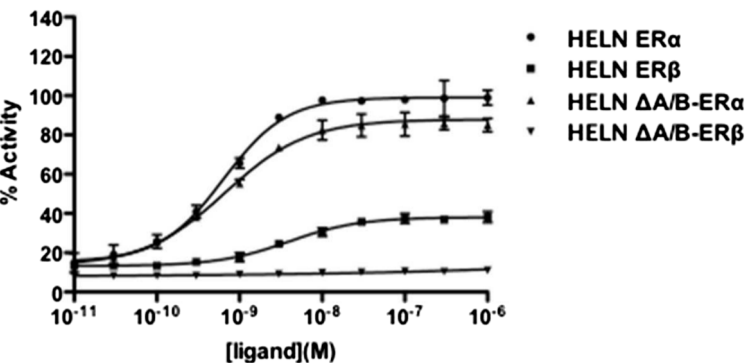

Supplement: MOESM1 [file 9567188]
